# Supplementary material
Source: Springer Nature journal article supplement (https://www.springermedizin.de/resource/supplementary/12913_2012_2274_MOESM1_ESM.pdf/9529928)

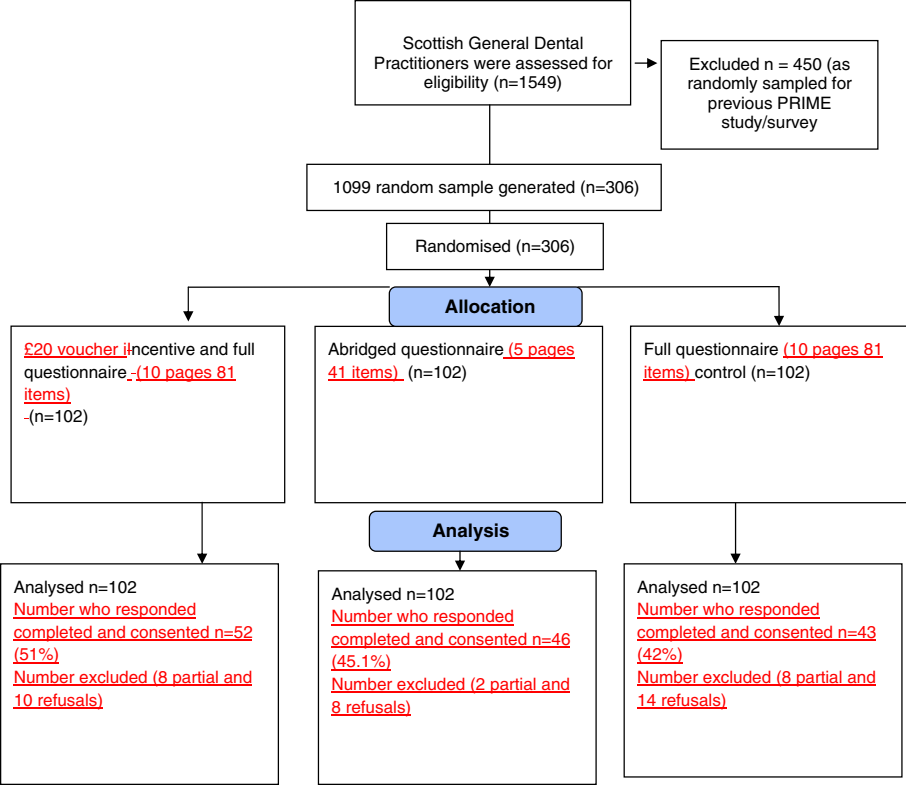

Supplement: MOESM1 [file 9529928]
